# Supplementary material for: Comparison of nanoLC-MALDI-MS/MS with nanoLC-TIMS-MS/MS in the proteomic analysis of extracellular vesicles of bronchoalveolar lavage fluid
Source: Royal Society of Chemistry journal article supplement (doi:10.1039/d4ay01599a), 2025-01-01
Supplement: d4ay01599a1.pdf [file d4ay01599a1.pdf]

Table S1.xlsx

This file cannot be rendered in this PDF. Please download the source file.

Table S2. List of 39 proteins among the TOP 100 proteins in ExoCarta.

| Sample | Spectrometric analysis | Protein ID | Protein name                                  |
|--------|------------------------|------------|-----------------------------------------------|
| ABs    | MALDI/TIMS             | A2M        | Alpha-2-Macroglobulin                         |
| ABs    | MALDI/TIMS             | ACTB       | Actin, Beta                                   |
| ABs    | TIMS                   | ACTG1      | Actin, Gamma 1                                |
| ABs    | MALDI/TIMS             | ANXA1      | Annexin A1                                    |
| ABs    | MALDI/TIMS             | ANXA2      | Annexin A2                                    |
| ABs    | TIMS                   | ANXA5      | Annexin A5                                    |
| ABs    | TIMS                   | CD9        | CD9 Molecule                                  |
| ABs    | TIMS                   | GNAI2      | G Protein Subunit Alpha I2                    |
| ABs    | TIMS                   | LGALS3BP   | Galectin 3 Binding Protein                    |
| MVs    | MALDI/TIMS             | A2M        | Alpha-Actinin 4                               |
| MVs    | MALDI/TIMS             | ACTB       | Actin, Beta                                   |
| MVs    | MALDI/TIMS             | ACTN4      | Annexin A4                                    |
| MVs    | MALDI/TIMS             | ANXA1      | Annexin A1                                    |
| MVs    | MALDI/TIMS             | ANXA2      | Annexin A2                                    |
| MVs    | TIMS                   | ANXA4      | Annexin A4                                    |
| MVs    | MALDI/TIMS             | ANXA5      | Annexin A1                                    |
| MVs    | TIMS                   | ANXA6      | Annexin A6                                    |
| MVs    | MALDI/TIMS             | CD9        | CD9 Molecule                                  |
| MVs    | TIMS                   | CLIC1      | Chloride Intracellular Channel 1              |
| MVs    | MALDI/TIMS             | GNAI2      | G Protein Subunit Alpha I2                    |
| MVs    | MALDI/TIMS             | LGALS3BP   | Galectin 3 Binding Protein                    |
| MVs    | TIMS                   | LDHB       | Lactate Dehydrogenase B                       |
| MVs    | TIMS                   | PGK1       | Phosphoglycerate Kinase 1                     |
| MVs    | TIMS                   | CDC42      | Cell Division Cycle 42                        |
| MVs    | TIMS                   | EZR        | Ezrin                                         |
| MVs    | TIMS                   | HSPA1A     | Heat Shock Protein Family A (Hsp70) Member 1A |
| EXOs   | MALDI/TIMS             | A1BG       | Alpha-1-B Glycoprotein                        |
| EXOs   | MALDI/TIMS             | A2M        | Alpha-Actinin 4                               |
| EXOs   | TIMS                   | NAT1       | N-Acetyltransferase 1                         |
| EXOs   | TIMS                   | NAT2       | N-Acetyltransferase 2                         |
| EXOs   | TIMS                   | SERPINA3   | Serpin Family A Member 3                      |
| EXOs   | MALDI/TIMS             | ACP1       | Acid Phosphatase 1                            |
| EXOs   | MALDI/TIMS             | ACP2       | Acid Phosphatase 2                            |
| EXOs   | MALDI/TIMS             | ACADL      | Acyl-CoA Dehydrogenase, Long Chain            |
| EXOs   | MALDI/TIMS             | ACADM      | Acyl-CoA Dehydrogenase, Medium Chain          |
| EXOs   | MALDI/TIMS             | ACADS      | Acyl-CoA Dehydrogenase, Short Chain           |
| EXOs   | MALDI/TIMS             | ACADSB     | Acyl-CoA Dehydrogenase, Short/Branched Chain  |
| EXOs   | MALDI/TIMS             | ACADVL     | Acyl-CoA Dehydrogenase, Very Long Chain       |

|      |            |        |                                 |
|------|------------|--------|---------------------------------|
| EXOs | MALDI/TIMS | ACTA1  | Actin, Alpha 1, Skeletal Muscle |
| EXOs | MALDI/TIMS | ACTA2  | Actin, Alpha 2, Smooth Muscle   |
| EXOs | MALDI/TIMS | ACTB   | Actin, Beta                     |
| EXOs | MALDI/TIMS | ACTG1  | Actin, Gamma 1                  |
| EXOs | MALDI/TIMS | ACTG2  | Actin, Gamma 2, Smooth Muscle   |
| EXOs | TIMS       | ACTN1  | Alpha-Actinin 1                 |
| EXOs | TIMS       | ACTN2  | Alpha-Actinin 2                 |
| EXOs | MALDI/TIMS | ACTN4  | Alpha-Actinin 4                 |
| EXOs | TIMS       | ACVR1  | Activin A Receptor Type 1       |
| EXOs | TIMS       | ACVR1B | Activin A Receptor Type 1B      |
| EXOs | TIMS       | ACOX1  | Acyl-CoA Oxidase 1              |
| EXOs | MALDI/TIMS | ACLY   | ATP Citrate Lyase               |
| EXOs | TIMS       | ACTC1  | Actin, Alpha Cardiac Muscle 1   |
