# Supplementary material for: Comparison of nanoLC-MALDI-MS/MS with nanoLC-TIMS-MS/MS in the proteomic analysis of extracellular vesicles of bronchoalveolar lavage fluid
Source: Royal Society of Chemistry journal article supplement (doi:10.1039/d4ay01599a), 2025-01-01
Supplement: d4ay01599a2.xlsx [file d4ay01599a2.xlsx]

## Sheet: Table S1
Table S1 List of 1637 proteins among the protein list in ExoCarta
Protein ID	Protein name
A1BG	Alpha-1-B Glycoprotein
A2ML1	Alpha-2-Macroglobulin Like 1
AAAS	Aladin WD Repeat Nucleoporin
AACS	Acetoacetyl-CoA Synthetase
AAK1	AP2 Associated Kinase 1
AAMP	Angio-Associated Migratory Cell Protein
ABCA1	ATP Binding Cassette Subfamily A Member 1
ABCA3	ATP Binding Cassette Subfamily A Member 3
ABCB9	ATP Binding Cassette Subfamily B Member 9
ABCD3	ATP Binding Cassette Subfamily D Member 3
ABCE1	ATP Binding Cassette Subfamily E Member 1
ABCF1	ATP Binding Cassette Subfamily F Member 1
ABCF2	ATP Binding Cassette Subfamily F Member 2
ABCF3	ATP Binding Cassette Subfamily F Member 3
ABHD3	Abhydrolase Domain Containing 3
ABI1	Abl Interactor 1
ABI2	Abl Interactor 2
ABI3	Abl Interactor 3
ABR	Active BCR-Related
ACACA	Acetyl-CoA Carboxylase Alpha
ACAD9	Acyl-CoA Dehydrogenase Family Member 9
ACADS	Acyl-CoA Dehydrogenase Short Chain
ACAP2	ArfGAP With Coiled-Coil, Ankyrin Repeat And PH Domains 2
ACBD5	Acyl-CoA Binding Domain Containing 5
ACE	Angiotensin I Converting Enzyme
ACLY	ATP Citrate Lyase
ACOT1	Acyl-CoA Thioesterase 1
ACOT9	Acyl-CoA Thioesterase 9
ACOX1	Acyl-CoA Oxidase 1
ACSF2	Acyl-CoA Synthetase Family Member 2
ACSL1	Acyl-CoA Synthetase Long Chain Family Member 1
ACSL3	Acyl-CoA Synthetase Long Chain Family Member 3
ACSL4	Acyl-CoA Synthetase Long Chain Family Member 4
ACTB	Actin Beta
ACTN1	Actinin Alpha 1
ACTN4	Actinin Alpha 4
ADAM9	ADAM Metallopeptidase Domain 9
ADCY1	Adenylate Cyclase 1
ADCY6	Adenylate Cyclase 6
ADCY7	Adenylate Cyclase 7
ADGB	Androglobin
ADH7	Alcohol Dehydrogenase 7
ADPGK	ADP Dependent Glucokinase
ADRM1	Adhesion Regulating Molecule 1
AGFG1	ArfGAP With FG Repeats 1
AGFG2	ArfGAP With FG Repeats 2
AGK	Acylglycerol Kinase
AGR2	Anterior Gradient 2
AGR3	Anterior Gradient 3
AHSA1	Activator Of Hsp90 ATPase Activity 1
AIDA	Axin Interactor, Dorsalization Associated
AIFM1	Apoptosis Inducing Factor Mitochondria Associated 1
AIMP1	Aminoacyl tRNA Synthetase Complex Interacting Multifunctional Protein 1
AIMP2	Aminoacyl tRNA Synthetase Complex Interacting Multifunctional Protein 2
AIP	Aryl Hydrocarbon Receptor Interacting Protein
AKAP9	A-Kinase Anchoring Protein 9
AKT1	AKT Serine/Threonine Kinase 1
ALDH2	Aldehyde Dehydrogenase 2
ALDOA	Aldolase, Fructose-Bisphosphate A
ALDOB	Aldolase, Fructose-Bisphosphate B
ALDOC	Aldolase, Fructose-Bisphosphate C
AMBP	Alpha-1-Microglobulin/Bikunin Precursor
AMFR	Autocrine Motility Factor Receptor
AMPD2	Adenosine Monophosphate Deaminase 2
AMPD3	Adenosine Monophosphate Deaminase 3
ANK1	Ankyrin 1
ANK3	Ankyrin 3
ANO6	Anoctamin 6
ANXA1	Annexin A1
ANXA2	Annexin A2
ANXA3	Annexin A3
ANXA4	Annexin A4
ANXA5	Annexin A5
ANXA6	Annexin A6
ANXA7	Annexin A7
AOC3	Amine Oxidase, Copper Containing 3
AP1AR	Adaptor-Related Protein Complex 1 Associated Regulatory Protein
AP1B1	Adaptor-Related Protein Complex 1 Beta 1 Subunit
AP1G1	Adaptor-Related Protein Complex 1 Gamma 1 Subunit
AP1G2	Adaptor-Related Protein Complex 1 Gamma 2 Subunit
AP1M1	Adaptor-Related Protein Complex 1 Mu 1 Subunit
AP1M2	Adaptor-Related Protein Complex 1 Mu 2 Subunit
AP1S1	Adaptor-Related Protein Complex 1 Sigma 1 Subunit
AP1S2	Adaptor-Related Protein Complex 1 Sigma 2 Subunit
AP2A1	Adaptor-Related Protein Complex 2 Alpha 1 Subunit
AP2A2	Adaptor-Related Protein Complex 2 Alpha 2 Subunit
AP2B1	Adaptor-Related Protein Complex 2 Beta 1 Subunit
AP2M1	Adaptor-Related Protein Complex 2 Mu 1 Subunit
AP3B1	Adaptor-Related Protein Complex 3 Beta 1 Subunit
AP3D1	Adaptor-Related Protein Complex 3 Delta 1 Subunit
AP3M1	Adaptor-Related Protein Complex 3 Mu 1 Subunit
AP4M1	Adaptor-Related Protein Complex 4 Mu 1 Subunit
APEX1	Apurinic/Apyrimidinic Endodeoxyribonuclease 1
API5	Apoptosis Inhibitor 5
APLP2	Amyloid Beta Precursor-Like Protein 2
APOA1	Apolipoprotein A1
APOA2	Apolipoprotein A2
APOA4	Apolipoprotein A4
APOB	Apolipoprotein B
APOBR	Apolipoprotein B Receptor
APOC2	Apolipoprotein C2
APOC3	Apolipoprotein C3
APOD	Apolipoprotein D
APOE	Apolipoprotein E
APOF	Apolipoprotein F
APOH	Apolipoprotein H
APOL1	Apolipoprotein L1
APOL2	Apolipoprotein L2
APOM	Apolipoprotein M
AQP1	Aquaporin 1
AQP5	Aquaporin 5
ARAF	A-Raf Proto-Oncogene, Serine/Threonine Kinase
ARAP1	ArfGAP With RhoGAP Domain, Ankyrin Repeat And PH Domain 1
ARF4	ADP Ribosylation Factor 4
ARF6	ADP Ribosylation Factor 6
ARL1	ADP Ribosylation Factor Like GTPase 1
ARL2	ADP Ribosylation Factor Like GTPase 2
ARL3	ADP Ribosylation Factor Like GTPase 3
ARL8B	ADP Ribosylation Factor Like GTPase 8B
ARMC3	Armadillo Repeat Containing 3
ARMC8	Armadillo Repeat Containing 8
ARMC9	Armadillo Repeat Containing 9
ARPC2	Actin Related Protein 2/3 Complex Subunit 2
ARPC3	Actin Related Protein 2/3 Complex Subunit 3
ARPC4	Actin Related Protein 2/3 Complex Subunit 4
ARPC5	Actin Related Protein 2/3 Complex Subunit 5
ARRB1	Arrestin Beta 1
ARRB2	Arrestin Beta 2
ASAH1	N-Acylsphingosine Amidohydrolase 1
ASAP1	ArfGAP With SH3 Domain, Ankyrin Repeat And PH Domain 1
ASCC3	Activating Signal Cointegrator 1 Complex Subunit 3
ASNS	Asparagine Synthetase (Glutamine-Hydrolyzing)
ASPG	Asparaginase
ASPH	Aspartate Beta-Hydroxylase
ATAD1	ATPase Family, AAA Domain Containing 1
ATAD2	ATPase Family, AAA Domain Containing 2
ATG2A	Autophagy Related 2A
ATG3	Autophagy Related 3
ATG5	Autophagy Related 5
ATG7	Autophagy Related 7
ATL1	Atlastin GTPase 1
ATM	ATM Serine/Threonine Kinase
ATP5H	ATP Synthase Peripheral Stalk Subunit D
ATP5I	ATP Synthase Membrane Subunit E
ATP5L	ATP Synthase Membrane Subunit G
ATP9A	ATPase Phospholipid Transporting 9A (Putative)
ATRN	Attractin
BAG3	BCL2 Associated Athanogene 3
BAG6	BCL2 Associated Athanogene 6
BASP1	Brain Acid Soluble Protein 1
BAX	BCL2 Associated X, Apoptosis Regulator
BBS1	Bardet-Biedl Syndrome 1
BBS2	Bardet-Biedl Syndrome 2
BBS5	Bardet-Biedl Syndrome 5
BBS7	Bardet-Biedl Syndrome 7
BCAM	Basal Cell Adhesion Molecule (Lutheran Blood Group)
BCAR1	BCAR1 Scaffold Protein, Cas Family Member
BCAR3	BCAR3 Adaptor Protein, NSP Family Member
BCAS1	Breast Carcinoma Amplified Sequence 1
BCAS3	Breast Carcinoma Amplified Sequence 3
BCAT1	Branched Chain Amino Acid Transaminase 1
BCR	BCR, RhoGEF And GTPase Activating Protein
BICD2	BICD Cargo Adaptor 2
BID	BH3 Interacting Domain Death Agonist
BIN1	Bridging Integrator 1
BIN2	Bridging Integrator 2
BIRC6	Baculoviral IAP Repeat Containing 6
BLVRB	Biliverdin Reductase B
BMP1	Bone Morphogenetic Protein 1
BMP2K	BMP2 Inducible Kinase
BOLA2	BolA Family Member 2
BPI	Bactericidal/Permeability Increasing Protein
BPNT1	Bisphosphate 3'-Nucleotidase 1
BRAF	B-Raf Proto-Oncogene, Serine/Threonine Kinase
BRAP	BRCA1 Associated Protein
BRCC3	BRCA1/BRCA2-Containing Complex Subunit 3
BROX	BRO1 Domain And CAAX Motif Containing
BST1	Bone Marrow Stromal Cell Antigen 1
BTD	Biotinidase
BTK	Bruton Tyrosine Kinase
BUB3	BUB3 Mitotic Checkpoint Protein
C1QA	Complement C1q A Chain
C1QB	Complement C1q B Chain
C1QBP	Complement C1q Binding Protein
C1QC	Complement C1q C Chain
C1R	Complement C1r
C1RL	Complement C1r Subcomponent Like
C1S	Complement C1s
C4BPA	Complement Component 4 Binding Protein Alpha
C4BPB	Complement Component 4 Binding Protein Beta
C5AR1	Complement C5a Receptor 1
CADM4	Cell Adhesion Molecule 4
CALR	Calreticulin
CALU	Calumenin
CAMP	Cathelicidin Antimicrobial Peptide
CAND1	Cullin Associated And Neddylation Dissociated 1
CANT1	Calcium Activated Nucleotidase 1
CAP1	Cyclase Associated Actin Cytoskeleton Regulatory Protein 1
CAP2	Cyclase Associated Actin Cytoskeleton Regulatory Protein 2
CAPG	Capping Actin Protein, Gelsolin Like
CAPZB	Capping Actin Protein Of Muscle Z-Line Beta Subunit
CARD6	Caspase Recruitment Domain Family Member 6
CARD9	Caspase Recruitment Domain Family Member 9
CARM1	Coactivator Associated Arginine Methyltransferase 1
CASP1	Caspase 1
CASP4	Caspase 4
CASP8	Caspase 8
CAV2	Caveolin 2
CBR1	Carbonyl Reductase 1
CBX3	Chromobox 3
CCDC6	Coiled-Coil Domain Containing 6
CD109	CD109 antigen
CD14	CD14 molecule
CD151	CD151 molecule (Raph blood group)
CD177	CD177 molecule
CD2AP	CD2-associated protein
CD302	CD302 molecule
CD33	CD33 molecule
CD36	CD36 molecule
CD3D	CD3d molecule
CD3E	CD3e molecule
CD44	CD44 molecule (Indian blood group)
CD47	CD47 molecule
CD5	CD5 molecule
CD59	CD59 molecule (CD59 blood group)
CD5L	CD5 molecule-like
CD63	CD63 molecule
CD81	CD81 molecule
CD9	CD9 molecule
CDC37	Cell division cycle 37
CDC42	Cell division cycle 42
CDC5L	Cell division cycle 5-like
CDHR2	Cadherin-related family member 2
CDHR3	Cadherin-related family member 3
CDHR4	Cadherin-related family member 4
CDIPT	CDP-diacylglycerol-inositol 3-phosphatidyltransferase
CDK1	Cyclin-dependent kinase 1
CDK5	Cyclin-dependent kinase 5
CDK6	Cyclin-dependent kinase 6
CDV3	CDV3 homolog
CEP41	Centrosomal protein 41
CETP	Cholesteryl ester transfer protein
CHDH	Choline dehydrogenase
CHIT1	Chitinase 1
CHMP3	Charged multivesicular body protein 3
CHMP5	Charged multivesicular body protein 5
CHMP6	Charged multivesicular body protein 6
CHPF2	Chondroitin polymerizing factor 2
CHST4	Carbohydrate sulfotransferase 4
CHST6	Carbohydrate sulfotransferase 6
CIAO1	Cytosolic iron-sulfur assembly component 1
CIB1	Calcium and integrin binding 1
CILP2	Cartilage intermediate layer protein 2
CIRBP	Cold-inducible RNA binding protein
CISD2	CDGSH iron sulfur domain 2
CKAP4	Cytoskeleton-associated protein 4
CLCC1	Chloride channel CLIC-like 1
CLIC1	Chloride intracellular channel 1
CLIC3	Chloride intracellular channel 3
CLIC4	Chloride intracellular channel 4
CLIC6	Chloride intracellular channel 6
CLIP1	CAP-Gly domain containing linker protein 1
CLMN	Calmin
CLN5	CLN5 lysosomal trafficking protein
CLPB	ClpB caseinolytic peptidase B homolog
CLPP	ClpP caseinolytic peptidase P
CLU	Clusterin
CLYBL	Citrate lyase beta like
CMPK2	Cytidine monophosphate kinase 2
CNDP2	Carnosine dipeptidase 2
CNN2	Calponin 2
CNOT1	CCR4-NOT transcription complex subunit 1
CNOT2	CCR4-NOT transcription complex subunit 2
CNOT3	CCR4-NOT transcription complex subunit 3
CNPY2	Canopy FGF signaling regulator 2
CNTN1	Contactin 1
CNTN4	Contactin 4
CNTN6	Contactin 6
COBL	Cordon-bleu WH2 repeat protein
COG4	Component of oligomeric Golgi complex 4
COG8	Component of oligomeric Golgi complex 8
COMP	Cartilage oligomeric matrix protein
COMT	Catechol-O-methyltransferase
COPA	Coatomer protein complex subunit alpha
COPB2	Coatomer protein complex subunit beta 2
COPD	Coatomer protein complex subunit delta
COPE	Coatomer protein complex subunit epsilon
COPG1	Coatomer protein complex subunit gamma 1
COPG2	Coatomer protein complex subunit gamma 2
COPZ1	Coatomer protein complex subunit zeta 1
COQ6	Coenzyme Q6 monooxygenase
CORO7	Coronin 7
COTL1	Coactosin-like F-actin binding protein 1
COX2	Cytochrome c oxidase subunit II
COX20	Cytochrome c oxidase assembly factor COX20
COX5A	Cytochrome c oxidase subunit 5A
COX5B	Cytochrome c oxidase subunit 5B
COX6C	Cytochrome c oxidase subunit 6C
CPN2	Carboxypeptidase N subunit 2
CPNE1	Copine 1
CPNE2	Copine 2
CPNE3	Copine 3
CPSF3	Cleavage and polyadenylation specific factor 3
CPSF6	Cleavage and polyadenylation specific factor 6
CPT1A	Carnitine palmitoyltransferase 1A
CR1	Complement receptor 1
CR2	Complement receptor 2
CRIP1	Cysteine-rich protein 1
CRIP2	Cysteine-rich protein 2
CRK	CRK proto-oncogene
CRKL	CRK-like proto-oncogene
CRLF3	Cytokine receptor-like factor 3
CRNN	Cornulin
CROCC	Rootletin
CRP	C-reactive protein
CRYM	Crystallin mu
CSDE1	Cold shock domain containing E1
CSF1R	Colony stimulating factor 1 receptor
CSK	C-terminal Src kinase
CSN3	Casein kappa
CSPG4	Chondroitin sulfate proteoglycan 4
CSPP1	Centrosome and spindle pole associated protein 1
CSRP1	Cysteine and glycine-rich protein 1
CSTF1	Cleavage stimulation factor subunit 1
CTDP1	CTD small phosphatase 1
CUL3	Cullin 3
CUL4A	Cullin 4A
CUL5	Cullin 5
CUTA	CutA divalent cation tolerance homolog
CYB5B	Cytochrome b5 type B
CYLD	CYLD lysine 63 deubiquitinase
CYTB	Cytochrome b
DAB2	DAB adaptor protein 2
DACT1	Dishevelled binding antagonist of beta catenin 1
DAD1	Defender against cell death 1
DAG1	Dystroglycan 1
DAPK1	Death associated protein kinase 1
DAPP1	Dual adaptor of phosphotyrosine and 3-phosphoinositides 1
DBNL	Drebrin-like
DCAF7	DDB1 and CUL4 associated factor 7
DCD	Dermcidin
DCPS	Decapping enzyme, scavenger
DCTN1	Dynactin subunit 1
DCTN2	Dynactin subunit 2
DCTN3	Dynactin subunit 3
DCTN4	Dynactin subunit 4
DCTN6	Dynactin subunit 6
DCXR	Dicarbonyl and L-xylulose reductase
DDAH1	Dimethylarginine dimethylaminohydrolase 1
DDAH2	Dimethylarginine dimethylaminohydrolase 2
DDB1	Damage specific DNA binding protein 1
DDI2	DNA-damage inducible 1 homolog 2
DDR1	Discoidin domain receptor tyrosine kinase 1
DDX1	DEAD-box helicase 1
DDX17	DEAD-box helicase 17
DDX23	DEAD-box helicase 23
DDX24	DEAD-box helicase 24
DDX3X	DEAD-box helicase 3, X-linked
DDX42	DEAD-box helicase 42
DDX46	DEAD-box helicase 46
DDX5	DEAD-box helicase 5
DDX6	DEAD-box helicase 6
DDX60	DEAD-box helicase 60
DFFA	DNA fragmentation factor subunit alpha
DGKA	Diacylglycerol kinase alpha
DGKQ	Diacylglycerol kinase theta
DGKZ	Diacylglycerol kinase zeta
DHCR7	7-dehydrocholesterol reductase
DHRS1	Dehydrogenase/reductase 1
DHRS7	Dehydrogenase/reductase 7
DHX15	DEAH-box helicase 15
DHX30	DEAH-box helicase 30
DHX36	DEAH-box helicase 36
DHX58	DEAH-box helicase 58
DHX9	DEAH-box helicase 9
DIP2B	Disco-interacting protein 2 homolog B
DIP2C	Disco-interacting protein 2 homolog C
DIRC2	Disrupted in renal carcinoma 2
DKK3	Dickkopf WNT signaling pathway inhibitor 3
DMBT1	Deleted in malignant brain tumors 1
DMXL1	Dmx-like 1
DMXL2	Dmx-like 2
DNAI2	Dynein axonemal intermediate chain 2
DNAL4	Dynein axonemal light chain 4
DNM1L	Dynamin 1 like
DNMBP	Dynamin binding protein
DNPEP	Aspartyl aminopeptidase
DOCK1	Dedicator of cytokinesis 1
DOCK2	Dedicator of cytokinesis 2
DOCK4	Dedicator of cytokinesis 4
DOCK5	Dedicator of cytokinesis 5
DOCK8	Dedicator of cytokinesis 8
DOCK9	Dedicator of cytokinesis 9
DOHH	Deoxyhypusine hydroxylase/monooxygenase
DOK2	Docking protein 2
DOK3	Docking protein 3
DPCD	Deleted in primary ciliary dyskinesia homolog
DPM3	Dolichyl-phosphate mannosyltransferase subunit 3
DPP3	Dipeptidyl peptidase 3
DPP4	Dipeptidyl peptidase 4
DPP9	Dipeptidyl peptidase 9
DPYD	Dihydropyrimidine dehydrogenase
DRG1	Developmentally regulated GTP binding protein 1
DRG2	Developmentally regulated GTP binding protein 2
DSC1	Desmocollin 1
DSC2	Desmocollin 2
DSG1	Desmoglein 1
DSG2	Desmoglein 2
DSG3	Desmoglein 3
DTX3L	Deltex E3 ubiquitin ligase 3L
DUOX1	Dual oxidase 1
DVL2	Dishevelled segment polarity protein 2
DYDC2	DPY30 domain containing 2
DYSF	Dysferlin
ECH1	Enoyl-CoA hydratase 1
ECI1	Enoyl-CoA delta isomerase 1
ECM1	Extracellular matrix protein 1
EDC4	Enhancer of mRNA decapping 4
EDIL3	EGF like repeats and discoidin domains 3
EEA1	Early endosome antigen 1
EFHB	EF-hand domain family member B
EFHC1	EF-hand domain containing 1
EFHD2	EF-hand domain containing 2
EFNB1	Ephrin B1
EGF	Epidermal growth factor
EHD1	EH domain containing 1
EHD2	EH domain containing 2
EHD4	EH domain containing 4
EIF3A	Eukaryotic translation initiation factor 3 subunit A
EIF3B	Eukaryotic translation initiation factor 3 subunit B
EIF3D	Eukaryotic translation initiation factor 3 subunit D
EIF3E	Eukaryotic translation initiation factor 3 subunit E
EIF3F	Eukaryotic translation initiation factor 3 subunit F
EIF3I	Eukaryotic translation initiation factor 3 subunit I
EIF3J	Eukaryotic translation initiation factor 3 subunit J
EIF3K	Eukaryotic translation initiation factor 3 subunit K
EIF3L	Eukaryotic translation initiation factor 3 subunit L
EIF3M	Eukaryotic translation initiation factor 3 subunit M
ELMO1	Engulfment and cell motility 1
ELMO2	Engulfment and cell motility 2
EMC1	ER membrane protein complex subunit 1
EMC2	ER membrane protein complex subunit 2
EMC3	ER membrane protein complex subunit 3
EMC4	ER membrane protein complex subunit 4
EMC7	ER membrane protein complex subunit 7
EMD	Emerin
ENAH	Enabled homolog
ENPP2	Ectonucleotide pyrophosphatase/phosphodiesterase 2
EPB41	Erythrocyte membrane protein band 4.1
EPB42	Erythrocyte membrane protein band 4.2
EPDR1	Ependymin related 1
EPHB4	EPH receptor B4
EPN1	Epsin 1
EPS15	Epidermal growth factor receptor pathway substrate 15
EPS8	Epidermal growth factor receptor pathway substrate 8
ERAP1	Endoplasmic reticulum aminopeptidase 1
ERH	Enhancer of rudimentary homolog
ERMP1	Endoplasmic reticulum metallopeptidase 1
ERP29	Endoplasmic reticulum protein 29
ERP44	Endoplasmic reticulum protein 44
ESRP1	Epithelial splicing regulatory protein 1
ESYT1	Extended synaptotagmin 1
ESYT2	Extended synaptotagmin 2
ETFA	Electron transfer flavoprotein alpha subunit
ETFB	Electron transfer flavoprotein beta subunit
ETHE1	ETHE1 persulfide dioxygenase
EVI2B	Ecotropic viral integration site 2B
EVL	Enah/Vasp-like
EVPL	Envoplakin
EXOC1	Exocyst complex component 1
EXOC3	Exocyst complex component 3
EXOC6	Exocyst complex component 6
EXT1	Exostosin glycosyltransferase 1
F13B	Coagulation factor XIII B chain
FABP4	Fatty acid binding protein 4
FABP5	Fatty acid binding protein 5
FAF1	Fas associated factor 1
FAF2	Fas associated factor family member 2
FAM3B	FAM3 metabolism regulating signaling molecule B
FAM3D	FAM3 metabolism regulating signaling molecule D
FANCB	FA complementation group B
FARP1	FERM, ARH/RhoGEF and pleckstrin domain protein 1
FAS	Fas cell surface death receptor
FAT4	FAT atypical cadherin 4
FBLN1	Fibulin 1
FBLN5	Fibulin 5
FBXL8	F-box and leucine-rich repeat protein 8
FBXW9	F-box and WD repeat domain containing 9
FCAR	Fc fragment of IgA receptor
FCGBP	Fc fragment of IgG binding protein
FCHO2	FCH domain only 2
FCN1	Ficolin 1
FCN2	Ficolin 2
FCN3	Ficolin 3
FEN1	Flap structure-specific endonuclease 1
FES	FES proto-oncogene
FETUB	Fetuin B
FGD2	FYVE, RhoGEF, and PH domain containing 2
FGD4	FYVE, RhoGEF, and PH domain containing 4
FGFR2	Fibroblast growth factor receptor 2
FGR	FGR proto-oncogene
FHIT	Fragile histidine triad diadenosine triphosphatase
FHL1	Four and a half LIM domains 1
FHOD1	Formin homology 2 domain containing 1
FIG4	FIG4 phosphoinositide 5-phosphatase
FKBP2	FKBP prolyl isomerase 2
FKBP3	FKBP prolyl isomerase 3
FKBP4	FKBP prolyl isomerase 4
FKBP5	FKBP prolyl isomerase 5
FKBP8	FKBP prolyl isomerase 8
FLII	Flightless I actin binding protein
FLNA	Filamin A
FLNB	Filamin B
FLOT1	Flotillin 1
FLOT2	Flotillin 2
FMNL1	Formin-like protein 1
FMOD	Fibromodulin
FOLR1	Folate receptor 1
FOLR2	Folate receptor 2
FOXK1	Forkhead box K1
FPGT	Fucose-1-phosphate guanylyltransferase
FRAS1	Fraser extracellular matrix complex subunit 1
FREM2	FRAS1 related extracellular matrix 2
FRK	Fyn-related Src family tyrosine kinase
FSCN1	Fascin actin-bundling protein 1
FSD1L	Fibronectin type III and SPRY domain containing 1 like
FTO	Fat mass and obesity-associated protein
FUBP1	Far upstream element binding protein 1
FURIN	Furin
FUS	FUS RNA binding protein
FUT6	Fucosyltransferase 6
FUT8	Fucosyltransferase 8
FXR1	Fragile X mental retardation syndrome-related protein 1
FXR2	Fragile X mental retardation syndrome-related protein 2
G3BP1	G3BP stress granule assembly factor 1
G6PD	Glucose-6-phosphate dehydrogenase
GAB2	GRB2 associated binding protein 2
GAK	Cyclin G associated kinase
GALC	Galactosylceramidase
GALE	UDP-galactose-4-epimerase
GALK1	Galactokinase 1
GALK2	Galactokinase 2
GALM	Galactose mutarotase
GALNS	Galactosamine (N-acetyl)-6-sulfatase
GANAB	Glucosidase II alpha subunit
GARS	Glycyl-tRNA synthetase
GAS6	Growth arrest specific 6
GBF1	Golgi brefeldin A resistant guanine nucleotide exchange factor 1
GBP1	Guanylate binding protein 1
GBP2	Guanylate binding protein 2
GBP6	Guanylate binding protein 6
GCC1	GRIP and coiled-coil domain containing 1
GDAP1	Ganglioside-induced differentiation-associated protein 1
GDAP2	Ganglioside-induced differentiation-associated protein 2
GDE1	Glycerophosphodiester phosphodiesterase 1
GFPT1	Glutamine-fructose-6-phosphate transaminase 1
GGCT	Gamma-glutamylcyclotransferase
GGH	Gamma-glutamyl hydrolase
GGT5	Gamma-glutamyltransferase 5
GGT6	Gamma-glutamyltransferase 6
GHDC	GHD C-terminal domain containing 1
GHITM	Growth hormone inducible transmembrane protein
GHR	Growth hormone receptor
GIPC1	GIPC PDZ domain containing family member 1
GIT1	GIT ArfGAP 1
GIT2	GIT ArfGAP 2
GLOD4	Glyoxalase domain containing 4
GLRX3	Glutaredoxin 3
GLYR1	Glyoxylate reductase 1 homolog
GMDS	GDP-mannose 4,6-dehydratase
GMFG	Glia maturation factor gamma
GMIP	GEM interacting protein
GMPPA	GDP-mannose pyrophosphorylase A
GMPPB	GDP-mannose pyrophosphorylase B
GMPR2	Guanosine monophosphate reductase 2
GNA11	G protein subunit alpha 11
GNA13	G protein subunit alpha 13
GNA14	G protein subunit alpha 14
GNAI1	G protein subunit alpha i1
GNAI2	G protein subunit alpha i2
GNAI3	G protein subunit alpha i3
GNAQ	G protein subunit alpha q
GNAZ	G protein subunit alpha z
GNL1	Guanine nucleotide binding protein-like 1
GNPTG	N-acetylglucosamine-1-phosphotransferase gamma subunit
GNS	Glucosamine (N-acetyl)-6-sulfatase
GOLM1	Golgi membrane protein 1
GP1BA	Glycoprotein Ib platelet alpha subunit
GP2	Glycoprotein 2
GPA33	Glycoprotein A33
GPAA1	Glycosylphosphatidylinositol anchor attachment 1
GPC1	Glypican 1
GPC4	Glypican 4
GPD1L	Glycerol-3-phosphate dehydrogenase 1 like
GPM6A	Glycoprotein M6A
GPNMB	Glycoprotein nmb
GPX1	Glutathione peroxidase 1
GPX3	Glutathione peroxidase 3
GPX4	Glutathione peroxidase 4
GRB2	Growth factor receptor bound protein 2
GRHPR	Glyoxylate and hydroxypyruvate reductase
GRK6	G protein-coupled receptor kinase 6
GRN	Granulin precursor
GSDMB	Gasdermin B
GSDMD	Gasdermin D
GSK3A	Glycogen synthase kinase 3 alpha
GSK3B	Glycogen synthase kinase 3 beta
GSTA1	Glutathione S-transferase alpha 1
GSTA2	Glutathione S-transferase alpha 2
GSTK1	Glutathione S-transferase kappa 1
GSTO1	Glutathione S-transferase omega 1
GSTP1	Glutathione S-transferase pi 1
GSTT1	Glutathione S-transferase theta 1
GYS1	Glycogen synthase 1
HABP2	Hyaluronan binding protein 2
HACE1	HECT domain and ankyrin repeat containing E3 ubiquitin protein ligase 1
HBB	Hemoglobin subunit beta
HBD	Hemoglobin subunit delta
HBS1L	HBS1 like translational GTPase
HCFC1	Host cell factor C1
HCK	HCK proto-oncogene
HCLS1	Hematopoietic cell-specific Lyn substrate 1
HDAC6	Histone deacetylase 6
HDGF	Hepatoma-derived growth factor
HDHD2	Haloacid dehalogenase-like hydrolase domain containing 2
HEBP1	Heme binding protein 1
HEBP2	Heme binding protein 2
HEG1	Heart development protein with EGF like domains 1
HES4	Hes family bHLH transcription factor 4
HEXA	Hexosaminidase subunit alpha
HEXB	Hexosaminidase subunit beta
HGS	HGF activator
HIBCH	3-hydroxyisobutyryl-CoA hydrolase
HINT1	Histidine triad nucleotide binding protein 1
HINT2	Histidine triad nucleotide binding protein 2
HINT3	Histidine triad nucleotide binding protein 3
HIP1	Huntingtin interacting protein 1
HIP1R	Huntingtin interacting protein 1 related
HM13	Minor histocompatibility antigen 13
HMCN2	Hemicentin 2
HMHA1	Histocompatibility minor HA-1
HMOX1	Heme oxygenase 1
HMOX2	Heme oxygenase 2
HNMT	Histamine N-methyltransferase
HOOK3	Hook microtubule tethering protein 3
HPS3	Hermansky-Pudlak syndrome 3
HPT	Haptoglobin-related protein
HRG	Histidine-rich glycoprotein
HSDL2	Hydroxysteroid dehydrogenase like 2
HSPB1	Heat shock protein family B (small) member 1
HTRA1	HtrA serine peptidase 1
HUWE1	HECT, UBA and WWE domain containing E3 ubiquitin protein ligase 1
HVCN1	Hydrogen voltage gated channel 1
HYDIN	HYDIN ciliary and flagellar associated
HYI	Hydroxypyruvate isomerase
HYOU1	Hypoxia up-regulated 1
ICAM1	Intercellular adhesion molecule 1
ICAM2	Intercellular adhesion molecule 2
ICAM3	Intercellular adhesion molecule 3
ICAM5	Intercellular adhesion molecule 5
IDE	Insulin degrading enzyme
IDH3A	Isocitrate dehydrogenase 3 (NAD(+)) alpha
IDI1	Isopentenyl-diphosphate delta isomerase 1
IFIT1	Interferon-induced protein with tetratricopeptide repeats 1
IFIT3	Interferon-induced protein with tetratricopeptide repeats 3
IFIT5	Interferon-induced protein with tetratricopeptide repeats 5
IFT20	Intraflagellar transport 20
IFT27	Intraflagellar transport 27
IFT43	Intraflagellar transport 43
IFT46	Intraflagellar transport 46
IFT57	Intraflagellar transport 57
IFT74	Intraflagellar transport 74
IFT81	Intraflagellar transport 81
IFT88	Intraflagellar transport 88
IGBP1	Immunoglobulin (CD79A) binding protein 1
IGF1R	Insulin-like growth factor 1 receptor
IGF2	Insulin-like growth factor 2
IGHA1	Immunoglobulin heavy constant alpha 1
IGHA2	Immunoglobulin heavy constant alpha 2
IGHD	Immunoglobulin heavy constant delta
IGHG1	Immunoglobulin heavy constant gamma 1
IGHG2	Immunoglobulin heavy constant gamma 2
IGHG3	Immunoglobulin heavy constant gamma 3
IGHG4	Immunoglobulin heavy constant gamma 4
IGHM	Immunoglobulin heavy constant mu
IGJ	Immunoglobulin J chain
IGKC	Immunoglobulin kappa constant
IGLC2	Immunoglobulin lambda constant 2
IGLC7	Immunoglobulin lambda constant 7
IGLL1	Immunoglobulin lambda like polypeptide 1
IGLL5	Immunoglobulin lambda like polypeptide 5
IGSF8	Immunoglobulin superfamily member 8
IL16	Interleukin 16
IL18	Interleukin 18
IL3RA	Interleukin 3 receptor subunit alpha
ILF2	Interleukin enhancer binding factor 2
ILF3	Interleukin enhancer binding factor 3
ILK	Integrin linked kinase
ILKAP	Integrin linked kinase-associated serine/threonine phosphatase 2C
IMP3	IGF2 mRNA binding protein 3
IMPA1	Inositol monophosphatase 1
IMPA2	Inositol monophosphatase 2
INF2	Inverted formin 2
INHBA	Inhibin subunit beta A
INHBB	Inhibin subunit beta B
IPO5	Importin 5
IPO7	Importin 7
IPO9	Importin 9
IQCK	IQ motif containing K
IRAK1	Interleukin-1 receptor-associated kinase 1
IRAK4	Interleukin-1 receptor-associated kinase 4
IRF9	Interferon regulatory factor 9
IRS2	Insulin receptor substrate 2
ISCA2	Iron-sulfur cluster assembly 2
ISLR	Immunoglobulin superfamily containing leucine-rich repeat
ISLR2	Immunoglobulin superfamily containing leucine-rich repeat 2
ISOC1	Isochorismatase domain containing 1
IST1	IST1 homolog
ITCH	Itchy E3 ubiquitin protein ligase
ITIH1	Inter-alpha-trypsin inhibitor heavy chain 1
ITIH2	Inter-alpha-trypsin inhibitor heavy chain 2
ITIH3	Inter-alpha-trypsin inhibitor heavy chain 3
ITIH4	Inter-alpha-trypsin inhibitor heavy chain 4
ITIH5	Inter-alpha-trypsin inhibitor heavy chain 5
ITLN1	Intelectin 1
ITM2B	Integral membrane protein 2B
ITPA	Inosine triphosphatase
ITPK1	Inositol-tetrakisphosphate 1-kinase
ITPR1	Inositol 1,4,5-trisphosphate receptor type 1
ITSN1	Intersectin 1
ITSN2	Intersectin 2
IVD	Isovaleryl-CoA dehydrogenase
JAK1	Janus kinase 1
JMJD7	Jumonji domain containing 7
KALRN	Kalirin RhoGEF kinase
KCNN2	Potassium calcium-activated channel subfamily N member 2
KCNV2	Potassium voltage-gated channel subfamily V member 2
KHNYN	KH and NYN domain containing
KIF19	Kinesin family member 19
KIF1B	Kinesin family member 1B
KIF2A	Kinesin family member 2A
KIF3A	Kinesin family member 3A
KIF3B	Kinesin family member 3B
KIF6	Kinesin family member 6
KIF9	Kinesin family member 9
KLC1	Kinesin light chain 1
KLC4	Kinesin light chain 4
KLK1	Kallikrein 1
KLK10	Kallikrein 10
KLK11	Kallikrein 11
KLK13	Kallikrein 13
KLKB1	Plasma kallikrein
KMO	Kynurenine 3-monooxygenase
KNG1	Kininogen 1
KPRP	Keratinocyte proline-rich protein
KRT85	Keratin 85
KTN1	Kinectin 1
LAIR1	Leukocyte-associated immunoglobulin-like receptor 1
LAMA2	Laminin subunit alpha 2
LAMA3	Laminin subunit alpha 3
LAMB2	Laminin subunit beta 2
LAMC2	Laminin subunit gamma 2
LAMP1	Lysosomal associated membrane protein 1
LAMP2	Lysosomal associated membrane protein 2
LAMP3	Lysosomal associated membrane protein 3
LARP1	La ribonucleoprotein domain family member 1
LASP1	LIM and SH3 protein 1
LAT2	Linker for activation of T cells family member 2
LBP	Lipopolysaccharide binding protein
LBR	Lamin B receptor
LCA5	Lebercilin
LCAT	Lecithin-cholesterol acyltransferase
LCK	LCK proto-oncogene
LCMT1	Leucine carboxyl methyltransferase 1
LCN1	Lipocalin 1
LDHA	Lactate dehydrogenase A
LDHB	Lactate dehydrogenase B
LDLR	Low density lipoprotein receptor
LEMD2	LEM domain containing 2
LETM1	Leucine zipper and EF-hand containing transmembrane protein 1
LGMN	Legumain
LHPP	Phospholysine phosphohistidine inorganic pyrophosphate phosphatase
LIMA1	LIM domain and actin binding 1
LIMS1	LIM zinc finger domain containing 1
LIPG	Lipase G, endothelial type
LMAN1	Lectin, mannose-binding 1
LMAN2	Lectin, mannose-binding 2
LMF2	Lipase maturation factor 2
LMNA	Lamin A/C
LMNB1	Lamin B1
LMNB2	Lamin B2
LMO7	LIM domain only 7
LMTK2	Lemur tyrosine kinase 2
LPP	LIM domain containing preferred translocation partner in lipoma
LPXN	Leupaxin
LRBA	LPS-responsive beige-like anchor protein
LRCH1	Leucine-rich repeats and calponin homology (CH) domain containing 1
LRCH3	Leucine-rich repeats and calponin homology (CH) domain containing 3
LRCH4	Leucine-rich repeats and calponin homology (CH) domain containing 4
LRP1	LDL receptor related protein 1
LRP2	LDL receptor related protein 2
LRRK2	Leucine-rich repeat kinase 2
LRRN4	Leucine-rich repeat neuronal 4
LSM12	LSM12 homolog
LSM2	LSM2 homolog
LSM3	LSM3 homolog
LSP1	Lymphocyte specific protein 1
LSR	Lipolysis-stimulated lipoprotein receptor
LSS	Lanosterol synthase
LST1	Leukocyte specific transcript 1
LTBP3	Latent transforming growth factor beta binding protein 3
LTN1	Listerin E3 ubiquitin protein ligase 1
LUM	Lumican
LXN	Latexin
LY75	Lymphocyte antigen 75
LYN	LYN proto-oncogene
LYPD2	Ly6/PLAUR domain containing 2
LYVE1	Lymphatic vessel endothelial hyaluronan receptor 1
LZTR1	Leucine zipper like transcription regulator 1
MACF1	Microtubule-actin crosslinking factor 1
MAGT1	Magnesium transporter 1
MAL2	MAL2 integral membrane trafficking protein
MANBA	Mannosidase beta
MAP1A	Microtubule-associated protein 1A
MAP1B	Microtubule-associated protein 1B
MAP1S	Microtubule-associated protein 1S
MAP2	Microtubule-associated protein 2
MAP4	Microtubule-associated protein 4
MAPK3	Mitogen-activated protein kinase 3
MARCO	Macrophage receptor with collagenous structure
MASP1	Mannan-binding lectin serine protease 1
MASP2	Mannan-binding lectin serine protease 2
MAT2B	Methionine adenosyltransferase 2 subunit beta
MATN3	Matrilin 3
MATR3	Matrin 3
MBL2	Mannose binding lectin 2
MBNL1	Muscleblind like splicing regulator 1
MCMBP	Minichromosome maintenance complex binding protein
MCTS1	Malignant T cell amplified sequence 1
MCU	Mitochondrial calcium uniporter
MDFI	MyoD family inhibitor
MECP2	Methyl CpG binding protein 2
MEMO1	Mediator of cell motility 1
MFAP2	Microfibril associated protein 2
MFAP4	Microfibril associated protein 4
MFN2	Mitofusin 2
MFSD1	Major facilitator superfamily domain containing 1
MGAT1	Mannosyl (alpha-1,3-)-glycoprotein beta-1,2-N-acetylglucosaminyltransferase 1
MGLL	Monoglyceride lipase
MGP	Matrix Gla protein
MGST1	Microsomal glutathione S-transferase 1
MGST2	Microsomal glutathione S-transferase 2
MICU1	Mitochondrial calcium uptake 1
MIF	Macrophage migration inhibitory factor
MKNK1	MAP kinase interacting serine/threonine kinase 1
MKRN2	Makorin ring finger protein 2
MKS1	Meckel syndrome, type 1
MLEC	Malectin
MLF1	Myeloid leukemia factor 1
MLF2	Myeloid leukemia factor 2
MMP12	Matrix metallopeptidase 12
MMP19	Matrix metallopeptidase 19
MMP2	Matrix metallopeptidase 2
MMP7	Matrix metallopeptidase 7
MMP8	Matrix metallopeptidase 8
MMP9	Matrix metallopeptidase 9
MMRN2	Multimerin 2
MNDA	Myeloid cell nuclear differentiation antigen
MOCS3	Molybdenum cofactor synthesis 3
MOGS	Mannosyl-oligosaccharide glucosidase
MPI	Mannose phosphate isomerase
MRC1	Mannose receptor C-type 1
MSLN	Mesothelin
MSRB2	Methionine sulfoxide reductase B2
MTA2	Metastasis-associated 1 family member 2
MTAP	Methylthioadenosine phosphorylase
MTCH1	Mitochondrial carrier 1
MTHFS	5,10-Methenyltetrahydrofolate synthetase
MTM1	Myotubularin 1
MTMR6	Myotubularin related protein 6
MTPN	Myotrophin
MTX1	Metaxin 1
MUC1	Mucin 1
MUC13	Mucin 13
MUC15	Mucin 15
MUC16	Mucin 16
MUC2	Mucin 2
MUC4	Mucin 4
MUC5B	Mucin 5B
MVP	Major vault protein
MX1	MX dynamin like GTPase 1
MYADM	Myeloid-associated differentiation marker
MYCBP	MYC binding protein
MYD88	MYD88 innate immune signal transducer
MYH10	Myosin heavy chain 10
MYH14	Myosin heavy chain 14
MYH9	Myosin heavy chain 9
MYL6	Myosin light chain 6
MYO1B	Myosin IB
MYO1C	Myosin IC
MYO1D	Myosin ID
MYO1E	Myosin IE
MYO1F	Myosin IF
MYO1G	Myosin IG
MYO5A	Myosin VA
MYO5B	Myosin VB
MYO5C	Myosin VC
MYO6	Myosin VI
MYO9B	Myosin IXB
MYOF	Myoferlin
MYPN	Myopalladin
NAA15	N-alpha-acetyltransferase 15
NAA50	N-alpha-acetyltransferase 50
NAAA	N-acylethanolamine acid amidase
NADK	NAD kinase
NAGK	N-acetylglucosamine kinase
NAMPT	Nicotinamide phosphoribosyltransferase
NANP	N-acetylneuraminate-9-phosphatase
NAPSA	Napsin A aspartic peptidase
NASP	Nuclear autoantigenic sperm protein
NBAS	Neuroblastoma amplified sequence
NBEA	Neurobeachin
NCALD	Neurocalcin delta
NCAM1	Neural cell adhesion molecule 1
NCBP1	Nuclear cap binding protein subunit 1
NCDN	Neurochondrin
NCEH1	Neutral cholesterol ester hydrolase 1
NCF2	Neutrophil cytosolic factor 2
NCF4	Neutrophil cytosolic factor 4
NCK1	NCK adaptor protein 1
NCLN	Nicalin
NCOA4	Nuclear receptor coactivator 4
NCOA5	Nuclear receptor coactivator 5
NCOR2	Nuclear receptor corepressor 2
NDNF	Neuron-derived neurotrophic factor
NDRG1	N-myc downstream regulated 1
NDRG2	N-myc downstream regulated 2
NDRG3	N-myc downstream regulated 3
NDST1	N-deacetylase and N-sulfotransferase 1
NEBL	Nebulette
NEK10	NIMA-related kinase 10
NEK2	NIMA-related kinase 2
NEK5	NIMA-related kinase 5
NEK7	NIMA-related kinase 7
NEK9	NIMA-related kinase 9
NEMF	Nuclear export mediator factor
NENF	Neudesin neurotrophic factor
NEO1	Neogenin 1
NFKB1	Nuclear factor kappa B subunit 1
NFKB2	Nuclear factor kappa B subunit 2
NFS1	NFS1 cysteine desulfurase
NHP2	H/ACA ribonucleoprotein complex subunit 2
NHSL2	NHS like 2
NIT1	Nitrilase 1
NIT2	Nitrilase 2
NLRC4	NLR family CARD domain containing 4
NLRP1	NLR family pyrin domain containing 1
NMT1	N-myristoyltransferase 1
NONO	Non-POU domain containing octamer binding
NOP56	NOP56 ribonucleoprotein
NOP58	NOP58 ribonucleoprotein
NPC1	NPC intracellular cholesterol transporter 1
NPC2	NPC intracellular cholesterol transporter 2
NPHP1	Nephrocystin 1
NPHP4	Nephrocystin 4
NPL	N-acetylneuraminate pyruvate lyase
NPNT	Nephronectin
NPTN	Neuroplastin
NQO1	NAD(P)H quinone dehydrogenase 1
NQO2	NAD(P)H quinone dehydrogenase 2
NRM	Nurim
NRP1	Neuropilin 1
NRP2	Neuropilin 2
NSDHL	NAD(P) dependent steroid dehydrogenase-like
NSF	N-ethylmaleimide sensitive factor
NSUN2	NOP2/Sun RNA methyltransferase 2
NT5C	5'-nucleotidase, cytosolic
NUBP1	Nucleotide binding protein 1
NUCB1	Nucleobindin 1
NUCB2	Nucleobindin 2
NUDC	Nuclear distribution C, dynein complex regulator
NUDT3	Nudix hydrolase 3
NUDT5	Nudix hydrolase 5
NUDT9	Nudix hydrolase 9
NUMA1	Nuclear mitotic apparatus protein 1
NUMB	NUMB, endocytic adaptor protein
NUP50	Nucleoporin 50
NUP54	Nucleoporin 54
NUP88	Nucleoporin 88
NUP93	Nucleoporin 93
NUP98	Nucleoporin 98
OAF	Olfactory receptor family 2 subfamily A member 4
OAS2	2'-5'-oligoadenylate synthetase 2
OAS3	2'-5'-oligoadenylate synthetase 3
OCRL	OCRL, inositol polyphosphate-5-phosphatase
OGFR	Opioid growth factor receptor
OLA1	Obg-like ATPase 1
OLFM4	Olfactomedin 4
OMD	Osteomodulin
OPA1	OPA1 mitochondrial dynamin like GTPase
OPTN	Optineurin
OS9	OS9 endoplasmic reticulum lectin
OSCAR	Osteoclast associated, immunoglobulin-like receptor
OSCP1	Organic solute carrier partner 1
OSGEP	O-sialoglycoprotein endopeptidase
OSTC	Oligosaccharyltransferase complex subunit
OSTF1	Osteoclast stimulating factor 1
OTOL1	Otolin 1
OTUB1	OTU deubiquitinase, ubiquitin aldehyde binding 1
OXR1	Oxidation resistance 1
OXSR1	Oxidative-stress responsive 1
P2RX4	Purinergic receptor P2X 4
P2RX7	Purinergic receptor P2X 7
P4HA1	Prolyl 4-hydroxylase subunit alpha 1
PA2G4	Proliferation-associated 2G4
PACRG	PARK2 co-regulated
PACS1	Phosphofurin acidic cluster sorting protein 1
PADI2	Peptidyl arginine deiminase 2
PADI4	Peptidyl arginine deiminase 4
PAEP	Progestagen-associated endometrial protein
PAF1	PAF1 homolog
PAIP1	Poly(A) binding protein interacting protein 1
PAK1	P21 (RAC1) activated kinase 1
PAK2	P21 (RAC1) activated kinase 2
PALLD	Palladin, cytoskeletal associated protein
PANK2	Pantothenate kinase 2
PANK4	Pantothenate kinase 4
PARK7	Parkinsonism associated deglycase
PARP1	Poly(ADP-ribose) polymerase 1
PARP4	Poly(ADP-ribose) polymerase family member 4
PATL1	Protein associated with topoisomerase II homolog 1
PBLD	Phenazine biosynthesis-like protein domain containing
PCBP1	Poly(rC) binding protein 1
PCBP2	Poly(rC) binding protein 2
PCCB	Propionyl-CoA carboxylase beta subunit
PCID2	PCI domain containing 2
PCM1	Pericentriolar material 1
PCNA	Proliferating cell nuclear antigen
PCNP	PEST proteolytic signal containing nuclear protein
PCSK5	Proprotein convertase subtilisin/kexin type 5
PCSK9	Proprotein convertase subtilisin/kexin type 9
PDCD4	Programmed cell death 4
PDE12	Phosphodiesterase 12
PDIA3	Protein disulfide isomerase family A member 3
PDIA4	Protein disulfide isomerase family A member 4
PDIA6	Protein disulfide isomerase family A member 6
PDPR	Pyruvate dehydrogenase phosphatase regulatory subunit
PDXK	Pyridoxal kinase
PEA15	Phosphoprotein enriched in astrocytes 15
PEBP1	Phosphatidylethanolamine binding protein 1
PEBP4	Phosphatidylethanolamine binding protein 4
PEF1	Penta-EF-hand domain containing 1
PEPD	Peptidase D
PEX3	Peroxisomal biogenesis factor 3
PGAM1	Phosphoglycerate mutase 1
PGAM5	Phosphoglycerate mutase family member 5
PGK1	Phosphoglycerate kinase 1
PGM1	Phosphoglucomutase 1
PGM2	Phosphoglucomutase 2
PGP	Phosphoglycolate phosphatase
PHB2	Prohibitin 2
PHC3	Polyhomeotic homolog 3
PHF5A	PHD finger protein 5A
PHKG2	Phosphorylase kinase catalytic subunit gamma 2
PHRF1	PHD and ring finger domains 1
PI16	Peptidase inhibitor 16
PI4KA	Phosphatidylinositol 4-kinase alpha
PIGR	Polymeric immunoglobulin receptor
PIGT	Phosphatidylinositol glycan anchor biosynthesis class T
PILRA	Paired immunoglobulin-like type 2 receptor alpha
PIN1	Peptidylprolyl cis/trans isomerase, NIMA-interacting 1
PIP	Prolactin-induced protein
PIR	Pirin
PKN1	Protein kinase N1
PKN2	Protein kinase N2
PKP3	Plakophilin 3
PLCB2	Phospholipase C beta 2
PLCB4	Phospholipase C beta 4
PLCD1	Phospholipase C delta 1
PLCG1	Phospholipase C gamma 1
PLCG2	Phospholipase C gamma 2
PLD1	Phospholipase D1
PLD3	Phospholipase D3
PLEC	Plectin
PLEK	Pleckstrin
PLIN2	Perilipin 2
PLIN3	Perilipin 3
PLIN4	Perilipin 4
PLOD1	Procollagen-lysine,2-oxoglutarate 5-dioxygenase 1
PLOD3	Procollagen-lysine,2-oxoglutarate 5-dioxygenase 3
PLP2	Proteolipid protein 2
PLS1	Plastin 1
PLS3	Plastin 3
PLTP	Phospholipid transfer protein
PML	Promyelocytic leukemia
PMM1	Phosphomannomutase 1
PMM2	Phosphomannomutase 2
PMVK	Phosphomevalonate kinase
PNKP	Polynucleotide kinase 3'-phosphatase
PNPO	Pyridoxamine 5'-phosphate oxidase
PODXL	Podocalyxin like
PON1	Paraoxonase 1
PON3	Paraoxonase 3
POP7	POP7 homolog, ribonuclease P/MRP subunit
POSTN	Periostin
PPCS	Phosphopantothenoylcysteine synthetase
PPIA	Peptidylprolyl isomerase A
PPIB	Peptidylprolyl isomerase B
PPIC	Peptidylprolyl isomerase C
PPID	Peptidylprolyl isomerase D
PPIE	Peptidylprolyl isomerase E
PPIF	Peptidylprolyl isomerase F
PPIG	Peptidylprolyl isomerase G
PPIH	Peptidylprolyl isomerase H
PPIL3	Peptidylprolyl isomerase like 3
PPM1A	Protein phosphatase, Mg2+/Mn2+ dependent 1A
PPM1B	Protein phosphatase, Mg2+/Mn2+ dependent 1B
PPM1F	Protein phosphatase, Mg2+/Mn2+ dependent 1F
PPM1G	Protein phosphatase, Mg2+/Mn2+ dependent 1G
PPME1	Protein phosphatase methylesterase 1
PPOX	Protoporphyrinogen oxidase
PPT1	Palmitoyl-protein thioesterase 1
PPWD1	Peptidylprolyl isomerase domain and WD repeat containing 1
PRAF2	PRA1 domain family member 2
PRDX1	Peroxiredoxin 1
PRDX2	Peroxiredoxin 2
PRDX3	Peroxiredoxin 3
PRDX4	Peroxiredoxin 4
PRDX5	Peroxiredoxin 5
PRDX6	Peroxiredoxin 6
PREB	Prolactin regulatory element binding
PREX1	Phosphatidylinositol-3,4,5-trisphosphate-dependent Rac exchange factor 1
PRG2	Proteoglycan 2
PRG4	Proteoglycan 4
PRKDC	Protein kinase, DNA-activated, catalytic polypeptide
PRKRA	Protein activator of interferon induced protein kinase EIF2AK2
PROM1	Prominin 1
PROZ	Protein Z
PRPS1	Phosphoribosyl pyrophosphate synthetase 1
PRPS2	Phosphoribosyl pyrophosphate synthetase 2
PRRC1	Proline-rich coiled-coil 1
PRSS8	Serine protease 8
PSCA	Prostate stem cell antigen
PSMD1	Proteasome 26S subunit, non-ATPase 1
PSMD2	Proteasome 26S subunit, non-ATPase 2
PSMD3	Proteasome 26S subunit, non-ATPase 3
PSMD4	Proteasome 26S subunit, non-ATPase 4
PSMD5	Proteasome 26S subunit, non-ATPase 5
PSMD8	Proteasome 26S subunit, non-ATPase 8
PSMD9	Proteasome 26S subunit, non-ATPase 9
PSME1	Proteasome activator subunit 1
PSME2	Proteasome activator subunit 2
PSME3	Proteasome activator subunit 3
PSMG2	Proteasome assembly chaperone 2
PSPC1	Paraspeckle component 1
PTCD3	Pentatricopeptide repeat domain 3
PTEN	Phosphatase and tensin homolog
PTER	Phosphotriesterase related
PTGDS	Prostaglandin D2 synthase
PTGES	Prostaglandin E synthase
PTGR1	Prostaglandin reductase 1
PTGR2	Prostaglandin reductase 2
PTK7	PTK7 receptor tyrosine kinase
PTMS	Parathymosin
PTPRA	Protein tyrosine phosphatase receptor type A
PTPRC	Protein tyrosine phosphatase receptor type C
PTPRF	Protein tyrosine phosphatase receptor type F
PTPRG	Protein tyrosine phosphatase receptor type G
PTPRJ	Protein tyrosine phosphatase receptor type J
PTPRS	Protein tyrosine phosphatase receptor type S
PTX3	Pentraxin 3
PUF60	Poly(U) binding splicing factor 60
PUS1	Pseudouridine synthase 1
PVR	Poliovirus receptor
PXK	PX domain containing serine/threonine kinase
PYGB	Glycogen phosphorylase B
PYGL	Glycogen phosphorylase L
PZP	Pregnancy zone protein
QKI	QKI, KH domain containing RNA binding
QPCT	Glutaminyl-peptide cyclotransferase
QSOX1	Quiescin sulfhydryl oxidase 1
QSOX2	Quiescin sulfhydryl oxidase 2
RAB10	RAB10, member RAS oncogene family
RAB12	RAB12, member RAS oncogene family
RAB13	RAB13, member RAS oncogene family
RAB14	RAB14, member RAS oncogene family
RAB15	RAB15, member RAS oncogene family
RAB18	RAB18, member RAS oncogene family
RAB1A	RAB1A, member RAS oncogene family
RAB1B	RAB1B, member RAS oncogene family
RAB21	RAB21, member RAS oncogene family
RAB23	RAB23, member RAS oncogene family
RAB24	RAB24, member RAS oncogene family
RAB25	RAB25, member RAS oncogene family
RAB28	RAB28, member RAS oncogene family
RAB2A	RAB2A, member RAS oncogene family
RAB31	RAB31, member RAS oncogene family
RAB32	RAB32, member RAS oncogene family
RAB34	RAB34, member RAS oncogene family
RAB35	RAB35, member RAS oncogene family
RAB36	RAB36, member RAS oncogene family
RAB37	RAB37, member RAS oncogene family
RAB3D	RAB3D, member RAS oncogene family
RAB43	RAB43, member RAS oncogene family
RAB4B	RAB4B, member RAS oncogene family
RAB5A	RAB5A, member RAS oncogene family
RAB5B	RAB5B, member RAS oncogene family
RAB5C	RAB5C, member RAS oncogene family
RAB6A	RAB6A, member RAS oncogene family
RAB7A	RAB7A, member RAS oncogene family
RAB8B	RAB8B, member RAS oncogene family
RAB9A	RAB9A, member RAS oncogene family
RABL3	RAB, member RAS oncogene family-like 3
RAC1	Rac family small GTPase 1
RAC2	Rac family small GTPase 2
RAD50	RAD50 double strand break repair protein
RALA	RAS like proto-oncogene A
RALB	RAS like proto-oncogene B
RALY	RALY heterogeneous nuclear ribonucleoprotein
RAN	RAN, member RAS oncogene family
RAP1A	RAP1A, member of RAS oncogene family
RAP2A	RAP2A, member of RAS oncogene family
RAP2B	RAP2B, member of RAS oncogene family
RAP2C	RAP2C, member of RAS oncogene family
RASA1	RAS p21 protein activator 1
RBBP7	RB binding protein 7, chromatin remodeling factor
RBBP9	RB binding protein 9, serine hydrolase
RBM12	RNA binding motif protein 12
RBM14	RNA binding motif protein 14
RBM39	RNA binding motif protein 39
RBM4	RNA binding motif protein 4
RBM47	RNA binding motif protein 47
RBP2	Retinol binding protein 2
RBX1	Ring-box 1
RCC1	Regulator of chromosome condensation 1
RCC2	Regulator of chromosome condensation 2
RDH10	Retinol dehydrogenase 10
RDH11	Retinol dehydrogenase 11
RDH14	Retinol dehydrogenase 14
RECK	Reversion inducing cysteine rich protein with kazal motifs
REL	REL proto-oncogene, NF-kB subunit
RENBP	Renin binding protein
REPS1	RALBP1 associated Eps domain containing 1
RER1	RER1, retention in endoplasmic reticulum sorting receptor
RETN	Resistin
RFTN1	Raftlin lipid raft linker 1
RGL2	Ral guanine nucleotide dissociation stimulator like 2
RGS19	Regulator of G-protein signaling 19
RHEB	Ras homolog, mTORC1 binding
RHOA	Ras homolog family member A
RHOB	Ras homolog family member B
RHOC	Ras homolog family member C
RHOF	Ras homolog family member F (filopodia associated)
RHOG	Ras homolog family member G
RHPN2	Rhophilin Rho GTPase binding protein 2
RIBC1	RIB43A domain with coiled-coils 1
RIC8A	RIC8 guanine nucleotide exchange factor A
RIN3	Ras and Rab interactor 3
RIOK3	RIO kinase 3
RIPK1	Receptor interacting serine/threonine kinase 1
RIPK2	Receptor interacting serine/threonine kinase 2
RMND1	Required for meiotic nuclear division 1 homolog
RNF25	Ring finger protein 25
RNF31	Ring finger protein 31
RNPS1	RNA binding protein with serine rich domain 1
ROCK1	Rho associated coiled-coil containing protein kinase 1
ROCK2	Rho associated coiled-coil containing protein kinase 2
ROGDI	Rogdi homolog
RPAP3	RNA polymerase II associated protein 3
RPE	Ribulose-5-phosphate-3-epimerase
RPIA	Ribose 5-phosphate isomerase A
RPN1	Ribophorin I
RPN2	Ribophorin II
RPTOR	Regulatory associated protein of MTOR complex 1
RRAS	RAS related
RRBP1	Ribosome binding protein 1
RSPH3	Radial spoke head protein 3
RTCA	RNA 3'-terminal phosphate cyclase
RTF1	Rtf1 homolog, Paf1/RNA polymerase II complex component
RTKN2	Rhotekin 2
RTN1	Reticulon 1
RTN2	Reticulon 2
RTN4	Reticulon 4
RTN4R	Reticulon 4 receptor
RUFY1	RUN and FYVE domain containing 1
RUNX1	RUNX family transcription factor 1
RWDD4	RWD domain containing 4
S100P	S100 calcium binding protein P
SAA4	Serum amyloid A4
SAMD9	Sterile alpha motif domain containing 9
SARNP	SARS coronavirus nonstructural protein
SART3	Squamous cell carcinoma antigen recognized by T cells 3
SASH3	SAM and SH3 domain containing 3
SBDS	SBDS ribosome maturation factor
SCD	Stearoyl-CoA desaturase
SCEL	Sciellin
SCFD1	Sec1 family domain containing 1
SCIN	Scinderin
SCLY	Selenocysteine lyase
SCN9A	Sodium voltage-gated channel alpha subunit 9
SCP2	SCP2 sterol transfer protein
SCRIB	Scribbled planar cell polarity protein
SCRN1	Secernin 1
SCRN2	Secernin 2
SCYL2	SCY1 like pseudokinase 2
SDHA	Succinate dehydrogenase complex flavoprotein subunit A
SDHB	Succinate dehydrogenase complex iron sulfur subunit B
SDSL	Serine dehydratase-like
SEC13	SEC13 homolog
SELO	Selenoprotein O
SEP15	Selenoprotein F
SEPP1	Selenoprotein P
SEPT1	Septin 1
SEPT2	Septin 2
SEPT5	Septin 5
SEPT6	Septin 6
SEPT7	Septin 7
SEPT9	Septin 9
SETD3	SET domain containing 3
SETD7	SET domain containing 7
SF3A3	Splicing factor 3a subunit 3
SF3B1	Splicing factor 3b subunit 1
SF3B2	Splicing factor 3b subunit 2
SF3B3	Splicing factor 3b subunit 3
SFPQ	Splicing factor proline and glutamine rich
SFTPD	Surfactant protein D
SFXN1	Sideroflexin 1
SFXN3	Sideroflexin 3
SGPL1	Sphingosine-1-phosphate lyase 1
SGTA	Small glutamine rich tetratricopeptide repeat co-chaperone alpha
SH2B2	SH2B adaptor protein 2
SHBG	Sex hormone binding globulin
SHC1	SHC adaptor protein 1
SHPK	Sedoheptulokinase
SIDT2	SID1 transmembrane family member 2
SIK3	Salt inducible kinase 3
SIN3A	SIN3 transcription regulator family member A
SIPA1	Signal-induced proliferation associated 1
SKAP2	Src kinase associated phosphoprotein 2
SKP1	S-phase kinase associated protein 1
SLFN5	Schlafen family member 5
SLK	STE20 like kinase
SLPI	Secretory leukocyte peptidase inhibitor
SMAD1	SMAD family member 1
SMAD4	SMAD family member 4
SMAGP	Small cell adhesion glycoprotein
SMAP2	Small ArfGAP2
SMC1A	Structural maintenance of chromosomes 1A
SMC3	Structural maintenance of chromosomes 3
SMG8	SMG8 homolog, nonsense mediated mRNA decay factor
SMG9	SMG9 homolog, nonsense mediated mRNA decay factor
SMYD2	SET and MYND domain containing 2
SND1	Staphylococcal nuclease and tudor domain containing 1
SNED1	Sushi, nidogen and EGF-like domains 1
SNTB1	Syntrophin beta 1
SNX1	Sorting nexin 1
SNX11	Sorting nexin 11
SNX12	Sorting nexin 12
SNX17	Sorting nexin 17
SNX18	Sorting nexin 18
SNX2	Sorting nexin 2
SNX27	Sorting nexin 27
SNX3	Sorting nexin 3
SNX33	Sorting nexin 33
SNX4	Sorting nexin 4
SNX5	Sorting nexin 5
SNX6	Sorting nexin 6
SNX8	Sorting nexin 8
SON	SON DNA and RNA binding protein
SP100	SP100 nuclear antigen
SPAG1	Sperm associated antigen 1
SPAG6	Sperm associated antigen 6
SPCS2	Signal peptidase complex subunit 2
SPCS3	Signal peptidase complex subunit 3
SPEF2	Sperm flagellar 2
SPG21	SPG21, maspardin
SPNS1	Spinster homolog 1
SPRR3	Small proline rich protein 3
SPTA1	Spectrin alpha, erythrocytic 1
SRC	SRC proto-oncogene, non-receptor tyrosine kinase
SREK1	Splicing regulatory glutamine/lysine-rich protein 1
SRP14	Signal recognition particle 14
SRP54	Signal recognition particle 54
SRP68	Signal recognition particle 68
SRP72	Signal recognition particle 72
SRPRB	Signal recognition particle receptor subunit beta
SRR	Serine racemase
SRRM2	Serine/arginine repetitive matrix 2
SRSF1	Serine and arginine rich splicing factor 1
SRSF4	Serine and arginine rich splicing factor 4
SRSF7	Serine and arginine rich splicing factor 7
SRSF9	Serine and arginine rich splicing factor 9
SSH3	Slingshot protein phosphatase 3
SSRP1	Structure specific recognition protein 1
SSU72	SSU72 homolog, RNA polymerase II CTD phosphatase
ST14	Suppression of tumorigenicity 14
STAM2	Signal transducing adaptor molecule 2
STAT1	Signal transducer and activator of transcription 1
STAT2	Signal transducer and activator of transcription 2
STAT3	Signal transducer and activator of transcription 3
STAT6	Signal transducer and activator of transcription 6
STIP1	Stress-induced-phosphoprotein 1
STK10	Serine/threonine kinase 10
STK24	Serine/threonine kinase 24
STK33	Serine/threonine kinase 33
STK38	Serine/threonine kinase 38
STK39	Serine/threonine kinase 39
STK4	Serine/threonine kinase 4
STMN1	Stathmin 1
STOM	Stomatin
STRAP	Serine/threonine kinase receptor associated protein
STRN	Striatin
STRN3	Striatin 3
STRN4	Striatin 4
STS	Steryl-sulfatase
STT3A	STT3A, catalytic subunit of the oligosaccharyltransferase complex
STT3B	STT3B, catalytic subunit of the oligosaccharyltransferase complex
STX10	Syntaxin 10
STX11	Syntaxin 11
STX12	Syntaxin 12
STX18	Syntaxin 18
STX4	Syntaxin 4
STX7	Syntaxin 7
STX8	Syntaxin 8
SUMF2	Sulfatase modifying factor 2
SUN2	SUN domain containing 2
SURF1	Surfeit locus protein 1
SURF4	Surfeit locus protein 4
SUSD2	Sushi domain containing 2
SVEP1	Sushi, von Willebrand factor type A, EGF and pentraxin domain containing 1
SVIL	Supervillin
SYK	Spleen associated tyrosine kinase
SYNC	Syncoilin
SYNE1	Spectrin repeat containing nuclear envelope protein 1
SYNE2	Spectrin repeat containing nuclear envelope protein 2
SYNE3	Spectrin repeat containing nuclear envelope protein 3
SYNJ1	Synaptojanin 1
SYPL1	Synaptophysin like 1
SYTL1	Synaptotagmin-like 1
TAB1	TGF-beta activated kinase 1 (MAP3K7) binding protein 1
TAB2	TGF-beta activated kinase 1 (MAP3K7) binding protein 2
TACC1	Transforming acidic coiled-coil containing protein 1
TAF4	TATA-box binding protein associated factor 4
TANK	TRAF family member associated NFKB activator
TAOK2	TAO kinase 2
TAOK3	TAO kinase 3
TAP1	Transporter 1, ATP binding cassette subfamily B member
TAP2	Transporter 2, ATP binding cassette subfamily B member
TBCA	Tubulin folding cofactor A
TBCB	Tubulin folding cofactor B
TBCC	Tubulin folding cofactor C
TBCD	Tubulin folding cofactor D
TBCE	Tubulin folding cofactor E
TBCK	TBC1 domain containing kinase
TBK1	TANK binding kinase 1
TBL2	Transducin beta like 2
TDRD7	Tudor domain containing 7
TEKT1	Tektin 1
TEKT3	Tektin 3
TEKT4	Tektin 4
TEP1	Telomerase associated protein 1
TES	Testin LIM domain protein
TFF1	Trefoil factor 1
TFG	TRK-fused gene
TGFB2	Transforming growth factor beta 2
TGM1	Transglutaminase 1
TGM2	Transglutaminase 2
TGM3	Transglutaminase 3
THADA	THADA armadillo repeat containing
THEM6	Thioesterase superfamily member 6
THOP1	Thimet oligopeptidase 1
THRB	Thyroid hormone receptor beta
THTPA	Thiamine triphosphatase
TIMP1	TIMP metallopeptidase inhibitor 1
TIMP2	TIMP metallopeptidase inhibitor 2
TIPRL	TIP41 related pseudokinase
TKT	Transketolase
TLN1	Talin 1
TLR2	Toll like receptor 2
TMC4	Transmembrane channel like 4
TMC5	Transmembrane channel like 5
TMCO4	Transmembrane and coiled-coil domain family 4
TMED2	Transmembrane p24 trafficking protein 2
TMED5	Transmembrane p24 trafficking protein 5
TMED7	Transmembrane p24 trafficking protein 7
TMED8	Transmembrane p24 trafficking protein 8
TMF1	TATA element modulatory factor 1
TMOD3	Tropomodulin 3
TMPPE	Transmembrane protein with metallophosphoesterase domain
TMUB1	Transmembrane and ubiquitin like domain containing 1
TMX1	Thioredoxin related transmembrane protein 1
TNIK	TRAF2 and NCK interacting kinase
TNPO1	Transportin 1
TOM1	Target of myb1
TOR1A	Torsin family 1 member A
TOR1B	Torsin family 1 member B
TOR4A	Torsin family 4 member A
TPD52	Tumor protein D52
TPM1	Tropomyosin 1
TPM3	Tropomyosin 3
TPM4	Tropomyosin 4
TPP1	Tripeptidyl peptidase 1
TPP2	Tripeptidyl peptidase 2
TPPP	Tubulin polymerization promoting protein
TPPP3	Tubulin polymerization promoting protein family member 3
TPR	Translocated promoter region, nuclear basket protein
TRA2B	Transformer 2 beta homolog
TRABD	TraB domain containing
TRADD	TNFRSF1A associated via death domain
TRAF6	TNF receptor associated factor 6
TRAP1	TNF receptor associated protein 1
TREM2	Triggering receptor expressed on myeloid cells 2
TRHDE	Thyrotropin releasing hormone degrading enzyme
TRIM2	Tripartite motif containing 2
TRIO	Trio Rho guanine nucleotide exchange factor
TRIP6	Thyroid hormone receptor interactor 6
TRPV2	Transient receptor potential cation channel subfamily V member 2
TSC2	TSC complex subunit 2
TSN	Translin
TSNAX	Translin associated protein X
TSPO	Translocator protein
TSTD1	Thiosulfate sulfurtransferase, mitochondrial
TTC1	Tetratricopeptide repeat domain 1
TTC12	Tetratricopeptide repeat domain 12
TTC29	Tetratricopeptide repeat domain 29
TTC38	Tetratricopeptide repeat domain 38
TTC4	Tetratricopeptide repeat domain 4
TULP3	Tubby like protein 3
TWF1	Twinfilin actin binding protein 1
TWF2	Twinfilin actin binding protein 2
TXNIP	Thioredoxin interacting protein
TXNL1	Thioredoxin-like 1
TYK2	Tyrosine kinase 2
U2AF2	U2 small nuclear RNA auxiliary factor 2
UACA	Uveal autoantigen with coiled-coil domains and ankyrin repeats
UAP1	UDP-N-acetylglucosamine pyrophosphorylase 1
UBA1	Ubiquitin like modifier activating enzyme 1
UBA3	Ubiquitin like modifier activating enzyme 3
UBA5	Ubiquitin like modifier activating enzyme 5
UBA6	Ubiquitin like modifier activating enzyme 6
UBA7	Ubiquitin like modifier activating enzyme 7
UBAC1	Ubiquitin associated domain containing 1
UBAP1	Ubiquitin associated protein 1
UBE2A	Ubiquitin conjugating enzyme E2 A
UBE2K	Ubiquitin conjugating enzyme E2 K
UBE2N	Ubiquitin conjugating enzyme E2 N
UBE3A	Ubiquitin protein ligase E3A
UBE3C	Ubiquitin protein ligase E3C
UBE4A	Ubiquitin conjugation factor E4A
UBL4A	Ubiquitin like 4A
UBL5	Ubiquitin like 5
UBR4	Ubiquitin protein ligase E3 component n-recognin 4
UBXN1	UBX domain protein 1
UBXN6	UBX domain protein 6
UCHL3	Ubiquitin C-terminal hydrolase L3
UCHL5	Ubiquitin C-terminal hydrolase L5
UEVLD	UEV and lactate/malate dehydrogenase domains
UFC1	Ubiquitin fold modifier conjugating enzyme 1
UFL1	UFM1 specific ligase 1
UFM1	Ubiquitin fold modifier 1
UGDH	UDP-glucose 6-dehydrogenase
UMPS	Uridine monophosphate synthetase
UPP1	Uridine phosphorylase 1
USO1	USO1 vesicle transport factor
USP9X	Ubiquitin specific peptidase 9 X-linked
UTRN	Utrophin
UXS1	UDP-glucuronate decarboxylase 1
VAC14	Vac14, PIKFYVE regulator
VAMP2	Vesicle associated membrane protein 2
VAMP3	Vesicle associated membrane protein 3
VAMP7	Vesicle associated membrane protein 7
VAMP8	Vesicle associated membrane protein 8
VASN	Vasorin
VASP	Vasodilator stimulated phosphoprotein
VAT1	Vesicle amine transport 1
VCAM1	Vascular cell adhesion molecule 1
VDAC1	Voltage dependent anion channel 1
VDAC2	Voltage dependent anion channel 2
VDAC3	Voltage dependent anion channel 3
VILL	Villin like
VMO1	Vitelline membrane outer layer 1
VNN1	Vanin 1
VNN2	Vanin 2
VPS11	VPS11, CORVET/HOPS core subunit
VPS16	VPS16, CORVET/HOPS core subunit
VPS18	VPS18, CORVET/HOPS core subunit
VPS25	VPS25, ESCRT-II complex subunit
VPS29	VPS29, retromer complex component
VPS35	VPS35, retromer complex component
VPS36	VPS36, ESCRT-II complex subunit
VPS39	VPS39, HOPS complex subunit
VPS41	VPS41, HOPS complex subunit
VPS45	VPS45, CORVET/HOPS core subunit
VPS4A	VPS4A, AAA ATPase
VPS4B	VPS4B, AAA ATPase
VPS52	VPS52, GARP complex subunit
VPS8	VPS8, CORVET subunit
VRK1	Vaccinia related kinase 1
VSIG4	V-set and immunoglobulin domain containing 4
VTA1	Vesicle trafficking 1
VTI1B	Vesicle transport through interaction with t-SNAREs 1B
VWA3B	Von Willebrand factor A domain containing 3B
VWA7	Von Willebrand factor A domain containing 7
VWF	Von Willebrand factor
WASF2	WASP family member 2
WDFY1	WD repeat and FYVE domain containing 1
WDFY4	WD repeat and FYVE domain containing 4
WDR1	WD repeat domain 1
WDR11	WD repeat domain 11
WDR19	WD repeat domain 19
WDR26	WD repeat domain 26
WDR35	WD repeat domain 35
WDR37	WD repeat domain 37
WDR41	WD repeat domain 41
WDR44	WD repeat domain 44
WDR47	WD repeat domain 47
WDR48	WD repeat domain 48
WDR54	WD repeat domain 54
WDR70	WD repeat domain 70
WDR81	WD repeat domain 81
WDR91	WD repeat domain 91
WFDC2	WAP four-disulfide core domain 2
WNK1	WNK lysine deficient protein kinase 1
XIAP	X-linked inhibitor of apoptosis
XPO1	Exportin 1
XPO4	Exportin 4
XPO7	Exportin 7
XRCC5	X-ray repair cross complementing 5
XRCC6	X-ray repair cross complementing 6
XRN2	5'-3' exoribonuclease 2
YIPF3	Yip1 interacting factor homolog 3
YKT6	YKT6 v-SNARE homolog
ZG16B	Zymogen granule protein 16B
ZNRF2	Zinc and ring finger 2
ZW10	ZW10 interacting kinetochore protein
ZYX	Zyxin
ZZEF1	Zinc finger ZZ-type and EF-hand domain containing 1
